# Supplementary material for: CRISPR/Cas9-Mediated Disruption of the lef8 and lef9 to Inhibit Nucleopolyhedrovirus Replication in Silkworms
Source: MDPI journal article supplement (doi:10.3390/v14061119), 2022-05-24
Supplement: s1 [file s1]

# Supplementary Material

**Table S1.** Primers used in this study.

| Primer Name            | Primer Sequence (5' to 3')                                                                                       |
|------------------------|------------------------------------------------------------------------------------------------------------------|
| <i>lef-8-F</i>         | TCAATTTTTCATTATCGTATTGTTGCAC                                                                                     |
| <i>lef-8-R</i>         | ATGACGGACGTAGTTCAAGATTT                                                                                          |
| <i>lef-9-F</i>         | ATGTTTTCTTTTTTGGATAAACTCCTACT                                                                                    |
| <i>lef-9-R</i>         | TCATTCAATAAACATGTCGAGCAAATG                                                                                      |
| <i>lef8-sg1-F</i>      | GGAAGATTTAAATCTGTGCGTTTTAGAGCTAGAAATAGCAAGTT                                                                     |
| <i>lef8-sg1-R</i>      | GCACAGAATTTAAATCTTCCACTTGTAGAGCACGATATTTTGTAT                                                                    |
| <i>lef8-sg2-F</i>      | CTCACTATAGGGCGAATTGGAGGTTATGTAGTACACATTGTTGTA                                                                    |
| <i>lef8-sg2-R</i>      | TAAACACACCTTTCTGACCACTTGTAGAGCACGATATTTTGTAT                                                                     |
| <i>lef9-sg1-F</i>      | GGCGCTAACACAGACTGCGAGTTTTAGAGCTAGAAA-<br>TAGCAAGTT                                                               |
| <i>lef9-sg1-R</i>      | TCGCACTCTGTGTTAGCGCCACTTGTAGAGCACGATATTTTGTAT                                                                    |
| <i>lef9-sg2-F</i>      | GCGCTATTACGGACGTGATGGTTTTAGAGCTAGAAA-<br>TAGCAAGTT                                                               |
| <i>lef9-sg2-R</i>      | CATCACGTCCGTAATAGCGCACTTGTAGAGCACGATATTTTGTAT                                                                    |
| Hind III -F            | CGAGGTCGACGGTATCGATAAGGTTATGTAGTACACATTGTTGTA                                                                    |
| Hind III -R            | TTTTCTTGTTATAGATATCAAAAAAAGCACCGACTCGGTGCCAC-<br>TTTTTCAAGTTGATAAC-<br>GGACTAGCCTTATTTTAACTTGCTATTTCTAGCTCTAAAAC |
| Overlap-F              | GCTAGCCATTGACTCCGCGGATCGAAGGTTATGTAGTACACATT-<br>GTTGTA                                                          |
| Overlap-R              | CCGCGGAGTCAATGGCTAGCAAAAAAGCAC-<br>CGACTCGGTGCCACTTTTTCAAGTTGATAAC-<br>GGACTAGCCTTATTTTAACTTGCTATTTCTAGCTCTAAAAC |
| <i>lef8-F-mut-test</i> | CTTTCCGACATTCTGTTGCCT                                                                                            |
| <i>lef8-R-mut-test</i> | TGCGCTCTTAATGAACAGCTC                                                                                            |
| <i>lef9-F-mut-test</i> | CGTGACACAGACACGTCAGCA                                                                                            |
| <i>lef9-R-mut-test</i> | GCTATAAGCTGTGTGAGCTGT                                                                                            |
| 3'Invers F1            | TAAAAAACAACAAACTCAAAATTTCTTC                                                                                     |
| 3'Invers R1            | GTTTGTTGAATTTATTATTAGTATGTAAGT                                                                                   |
| 3'Invers F2            | CAAAACTTTTATCGAATTCCTGCAG                                                                                        |
| 3'Invers F2            | AACCTCGATATACAGACCGA                                                                                             |
| M13-F                  | GTAAAACGACGGCCAGT                                                                                                |
| M13-R                  | CAGGAAACAGCTATGAC                                                                                                |
| <i>gp64-qPCR-F</i>     | CTTTAATGAGCAGACACGCAG                                                                                            |
| <i>gp64-qPCR-R</i>     | GCGGCGTTTCTACTTCGAAA                                                                                             |
| <i>lef3-qPCR-F</i>     | CGGAAGAGGTAGAACGGTCA                                                                                             |
| <i>lef3-qPCR-R</i>     | GTGCGAGGCTAAAGAAAACG                                                                                             |
| <i>ie-1-qRT-F</i>      | GCTCAAGACCACTGATAATCTC                                                                                           |
| <i>ie1-qRT-R</i>       | AATCGTCCAAGTATTCGTCCA                                                                                            |
| <i>p143-qRT-F</i>      | TGGCTTCATACTTTAGCAACC                                                                                            |
| <i>p143-qRT-R</i>      | GTTTGACGATGACAACCACAG                                                                                            |
| <i>vp39-qRT-F</i>      | TCTAAATCTCAATTCCTCCGTG                                                                                           |
| <i>vp39-qRT-R</i>      | GCATTCTAGACACCACAAACC                                                                                            |
| <i>p10-qRT-F</i>       | CCATTGCGGAAACTAACACA                                                                                             |
| <i>p10-qRT-R</i>       | AGCAGTGTCAACCGGTCAATA                                                                                            |
| <i>BmRP49-qPCR-F</i>   | AAACATACAAGATGGCTATAAGACCTG                                                                                      |
| <i>BmRP49-qPCR-R</i>   | TTTATAAATGACATGTGAACATACCTC                                                                                      |
| Pjet-F                 | CGACTCACTATAGGGAGAGCGGC                                                                                          |
| Pjet-R                 | AAGAACATCGATTTTCCATGGCAG                                                                                         |
| F3421                  | GTGGAGCTCCAGCTTTTGT                                                                                              |
| R3667                  | GTGAGTCAAAATGACGCATG                                                                                             |
